# Supplementary material for: Direct observation of the nanocomplex surface reorganization of antifouling silicones containing a highly mobile PEO-silane amphiphile
Source: Royal Society of Chemistry journal article supplement (doi:10.1039/c4tb01008f), 2014-01-01
Supplement: c4tb01008f1.pdf [file c4tb01008f1.pdf]

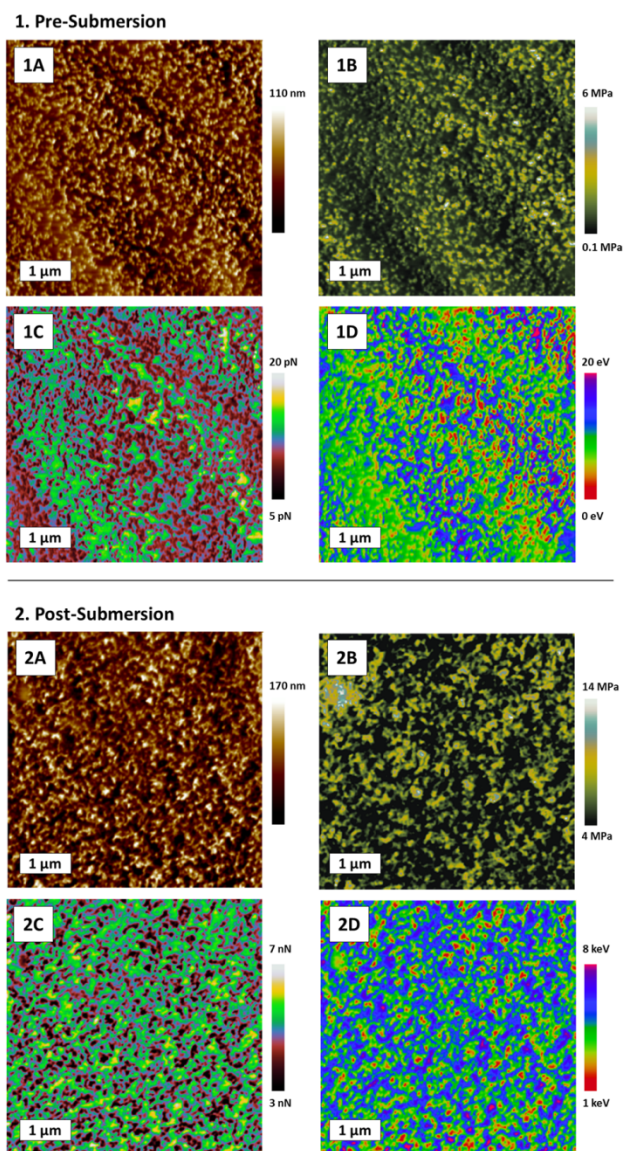

**Fig. S1** SFS of a  $25\ \mu\text{m}^2$  area before (1) and after (2) exposure to PBS. Topography (A) is overlaid with modulus (B), adhesion force (C) and dispersion force (D).

**Table S1** Contact angle analysis of spin-coated films

| Thickness (nm) <sup>a</sup> | Static contact angle (°) <sup>b</sup> |         |         |
|-----------------------------|---------------------------------------|---------|---------|
|                             | 15 sec                                | 1 min   | 2 min   |
| 101 ± 4 <sup>c</sup>        | 116 ± 1                               | 115 ± 1 | 114 ± 1 |
| 143 ± 1 <sup>d</sup>        | 114 ± 3                               | 113 ± 3 | 112 ± 3 |
| 341 ± 2 <sup>e</sup>        | 119 ± 1                               | 91 ± 19 | 56 ± 4  |
| 553 ± 1 <sup>e</sup>        | 118 ± 1                               | 58 ± 1  | 50 ± 0  |
| 703 ± 4 <sup>e</sup>        | 106 ± 6                               | 55 ± 1  | 48 ± 1  |

<sup>a</sup>Determined via ellipsometry (Alpha-SE, JA Woollman)

<sup>b</sup>Determined via contact angle (CAM200, KSV Instruments)

<sup>c</sup>Coatings formed via spin-coating (3000 rpm) from 3 drops of a 1 wt% hexane solution comprised of the PEO-silane amphiphile (9 wt% based on MED-1137).

<sup>d</sup>Coatings formed via spin-coating (3000 rpm) from 1 drop of a 2 wt% hexane solution comprised of the PEO-silane amphiphile (17 wt% based on MED-1137).

<sup>e</sup>Coatings formed via spin-coating (3000 rpm) from 1, 2 and 3 drops of a 5 wt% hexane solution comprised of the PEO-silane amphiphile (17 wt% based on MED-1137).

**Table S2** Metrics of reorganization kinetics

|                       | Metric                                | Definition                        |
|-----------------------|---------------------------------------|-----------------------------------|
| Height & Surface Area | $\Delta Z$ (nm)                       | Z range                           |
|                       | $A_{\text{surf}}$ ( $\mu\text{m}^2$ ) | Projected surface area            |
| Roughness             | $\text{RMS}_Z$ (nm)                   | Root-mean-squared Z variation     |
|                       | $\sigma_Z$ (nm)                       | Z standard deviation              |
| Phase                 | $\Delta\text{Ph}$ (degrees)           | Phase range                       |
|                       | $\text{RMS}_{\text{Ph}}$ (degrees)    | Root-mean-squared phase variation |
|                       | $\sigma_{\text{Ph}}$ (degrees)        | Phase standard deviation          |
| Amplitude             | $\Delta\text{Amp}$ (mV)               | Median amplitude differential     |
|                       | $\sigma_{\text{Amp}}$ (mV)            | Amplitude standard deviation      |
